# Supplementary material for: Efficacy and Safety of Abrocitinib in Patients with Severe and/or Difficult-to-Treat Atopic Dermatitis: A Post Hoc Analysis of the Randomized Phase 3 JADE COMPARE Trial
Source: PubMed Central journal article supplement — Am J Clin Dermatol. 2023 May 22;24(4):609–21. doi: 10.1007/s40257-023-00785-5 (PMC10293387; doi:10.1007/s40257-023-00785-5), 2023-05-22
Supplement: 40257_2023_785_MOESM1_ESM.pdf [file 40257_2023_785_MOESM1_ESM.pdf]

## Supplementary Information

### Efficacy and Safety of Abrocitinib in Patients With Severe and/or Difficult-to-Treat Atopic Dermatitis: A Post hoc Analysis of the Randomized Phase 3 JADE COMPARE Trial

**Journal:** *American Journal of Clinical Dermatology*

Eric L. Simpson,<sup>1</sup> Jonathan I. Silverberg,<sup>2</sup> Jacob P. Thyssen,<sup>3</sup> Manuelle Viguier,<sup>4</sup> Diamant Thaçi,<sup>5</sup> Marjolein de Bruin-Weller,<sup>6</sup> Stephan Weidinger,<sup>7</sup> Gary Chan,<sup>8</sup> Marco DiBonaventura,<sup>9</sup> Pinaki Biswas,<sup>9</sup> Claire Feeney,<sup>10</sup> Christopher Koulias,<sup>11</sup> Michael J. Cork<sup>12</sup>

<sup>1</sup>Oregon Health & Science University, Portland, OR, USA; <sup>2</sup>The George Washington University School of Medicine and Health Sciences, Washington, DC, USA; <sup>3</sup>Bispebjerg Hospital, University of Copenhagen, Copenhagen, Denmark; <sup>4</sup>Dermatologie-Vénérologie, Centre Hospitalier Universitaire de Reims, Reims, France; <sup>5</sup>University of Lübeck, Lübeck, Germany; <sup>6</sup>National Expertise Center for Atopic Dermatitis, University Medical Center Utrecht, The Netherlands; <sup>7</sup>University Hospital Schleswig-Holstein, Kiel, Germany; <sup>8</sup>Pfizer Inc., Groton, CT, USA; <sup>9</sup>Pfizer Inc., New York, NY, USA; <sup>10</sup>Pfizer Ltd., Tadworth, Surrey, United Kingdom; <sup>11</sup>Pfizer Hellas S.A., Athens, Greece; <sup>12</sup>Sheffield Dermatology Research, IICD, University of Sheffield and Sheffield Children's Hospital, Sheffield, United Kingdom

#### Corresponding author:

Christopher Koulias, MD

Pfizer Hellas S.A.

Athens, Greece

**Phone:** +30 210 6785613

**E-mail:** [christopher.koulias@pfizer.com](mailto:christopher.koulias@pfizer.com)

#### Funding

This study and the Open Access fee were sponsored by Pfizer Inc.

**Supplementary Table 1** Patient demographics and baseline disease characteristics by treatment group for patients with IGA= 4, EASI > 21, and EASI > 38

**Supplementary Table 2** Patient demographics and baseline disease characteristics by treatment group for patients with %BSA >50 and %BSA > 65

**Supplementary Table 3** Patient demographics and baseline disease characteristics by treatment group for patients who failed or were intolerant to prior systemic agents<sup>a</sup>

**Supplementary Table 4** Patient demographics and baseline disease characteristics by treatment group for the combined subgroup<sup>a</sup>

**Supplementary Table 5** Prior systemic therapies in patients who failed or were intolerant to prior therapy with systemic agents<sup>a</sup>

**Supplementary Table 6** Reasons for discontinuation of prior systemic therapies by treatment group in patients who failed or were intolerant to prior systemic agents<sup>a</sup>

**Supplementary Figure 1** Time (days) to first PP-NRS4 response in patients with baseline **a** IGA= 4, **b** EASI > 21, **c** EASI > 38, **d** failure of or intolerance to prior systemic agents,<sup>a</sup> **e** %BSA > 50, **f** %BSA > 65 and **g** in the combined subgroup<sup>b</sup>

**Supplementary Figure 2** LSM change from baseline in PP-NRS from day 2 to day 15 in patients with baseline **a** IGA = 4, **b** EASI > 21, **c** EASI > 38, **d** failure or intolerance to prior systemic agents,<sup>a</sup> **e** %BSA >50, **f** %BSA >65, and **g** in the combined subgroup<sup>b</sup>

**Supplementary Figure 3** LSM change from baseline in POEM at week 16 in patients with baseline **a** IGA= 4, **b** EASI > 21, **c** EASI > 38, **d** failure or intolerance to prior systemic agents,<sup>a</sup> **e** %BSA > 50, **f** %BSA > 65 and **g** in the combined subgroup<sup>b</sup>

**Supplementary Figure 4** LSM change from baseline in DLQI at week 16 in patients with baseline **a** IGA= 4, **b** EASI > 21, **c** EASI > 38, **d** failure or intolerance to prior systemic agents,<sup>a</sup> **e** %BSA > 50, **f** %BSA > 65 and **g** in the combined subgroup<sup>b</sup>

**Supplementary Table 1** Patient demographics and baseline disease characteristics by treatment group for patients with IGA= 4, EASI > 21, and EASI > 38

|                             | IGA= 4<br>n = 296 |                                |                                |                                 | EASI > 21<br>n = 603 |                                 |                                 |                                  | EASI > 38<br>n = 225 |                                |                                |                                 |
|-----------------------------|-------------------|--------------------------------|--------------------------------|---------------------------------|----------------------|---------------------------------|---------------------------------|----------------------------------|----------------------|--------------------------------|--------------------------------|---------------------------------|
|                             | Pbo<br>n = 43     | Abro<br>100 mg<br>QD<br>n = 85 | Abro<br>200 mg<br>QD<br>n = 88 | Dupi<br>300 mg<br>Q2W<br>n = 80 | Pbo<br>n = 97        | Abro<br>100 mg<br>QD<br>n = 160 | Abro<br>200 mg<br>QD<br>n = 171 | Dupi<br>300 mg<br>Q2W<br>n = 175 | Pbo<br>n = 39        | Abro<br>100 mg<br>QD<br>n = 63 | Abro<br>200 mg<br>QD<br>n = 63 | Dupi<br>300 mg<br>Q2W<br>n = 60 |
| Age, mean ± SD, years       | 37.7 ± 14.3       | 38.2 ± 14.9                    | 38.0 ± 15.1                    | 36.4 ± 14.1                     | 37.0 ± 15.3          | 36.8 ± 14.6                     | 37.5 ± 13.9                     | 36.1 ± 14.0                      | 35.2 ± 15.4          | 37.3 ± 14.2                    | 36.8 ± 14.9                    | 36.2 ± 13.2                     |
| Sex, n (%)                  |                   |                                |                                |                                 |                      |                                 |                                 |                                  |                      |                                |                                |                                 |
| Female                      | 14 (32.6)         | 36 (42.4)                      | 42 (47.7)                      | 38 (47.5)                       | 36 (37.1)            | 73 (45.6)                       | 82 (48.0)                       | 85 (48.6)                        | 12 (30.8)            | 29 (46.0)                      | 25 (39.7)                      | 25 (41.7)                       |
| Race, n (%)                 |                   |                                |                                |                                 |                      |                                 |                                 |                                  |                      |                                |                                |                                 |
| White                       | 23 (53.5)         | 58 (68.2)                      | 54 (61.4)                      | 48 (60.0)                       | 58 (59.8)            | 119 (74.4)                      | 115 (67.3)                      | 123 (70.3)                       | 22 (56.4)            | 47 (74.6)                      | 48 (76.2)                      | 44 (73.3)                       |
| Black or African American   | 4 (9.3)           | 4 (4.7)                        | 5 (5.7)                        | 5 (6.3)                         | 5 (5.2)              | 4 (2.5)                         | 6 (3.5)                         | 11 (6.3)                         | 4 (10.3)             | 3 (4.8)                        | 1 (1.6)                        | 2 (3.3)                         |
| Asian                       | 14 (32.6)         | 23 (27.1)                      | 27 (30.7)                      | 22 (27.5)                       | 27 (27.8)            | 36 (22.5)                       | 47 (27.5)                       | 35 (20.0)                        | 11 (28.2)            | 13 (20.6)                      | 14 (22.2)                      | 11 (18.3)                       |
| Other <sup>a</sup>          | 2 (4.6)           | 0 (0.0)                        | 2 (2.3)                        | 5 (6.2)                         | 7 (7.2)              | 1 (0.6)                         | 3 (1.8)                         | 6 (3.4)                          | 2 (5.1)              | 0 (0.0)                        | 0 (0.0)                        | 3 (5.0)                         |
| IGA score, n %              |                   |                                |                                |                                 |                      |                                 |                                 |                                  |                      |                                |                                |                                 |
| 3 (moderate)                | 0 (0.0)           | 0 (0.0)                        | 0 (0.0)                        | 0 (0.0)                         | 55 (56.7)            | 81 (50.6)                       | 88 (51.5)                       | 98 (56.0)                        | 13 (33.3)            | 13 (20.6)                      | 17 (27.0)                      | 21 (35.0)                       |
| 4 (severe)                  | 43 (100.0)        | 85 (100.0)                     | 88 (100.0)                     | 80 (100.0)                      | 42 (43.3)            | 79 (49.4)                       | 83 (48.5)                       | 77 (44.0)                        | 26 (66.7)            | 50 (79.4)                      | 46 (73.0)                      | 39 (65.0)                       |
| %BSA involvement, mean ± SD | 65.6 ± 23.0       | 62.8 ± 23.0                    | 60.6 ± 23.5                    | 60.1 ± 20.8                     | 56.9 ± 23.4          | 57.8 ± 21.0                     | 58.6 ± 20.5                     | 54.9 ± 19.7                      | 78.8 ± 13.0          | 75.8 ± 15.2                    | 76.4 ± 14.4                    | 73.3 ± 13.4                     |
| EASI score, mean ± SD       | 40.7 ± 11.9       | 41.0 ± 13.8                    | 40.7 ± 13.3                    | 39.4 ± 12.1                     | 35.5 ± 11.6          | 36.3 ± 12.7                     | 36.6 ± 11.9                     | 35.0 ± 11.0                      | 47.7 ± 6.7           | 49.6 ± 8.7                     | 49.7 ± 8.3                     | 47.8 ± 7.7                      |
| PP-NRS score, mean ± SD     | 7.6 ± 1.8         | 7.7 ± 1.4                      | 8.2 ± 1.5                      | 7.7 ± 1.6 <sup>b</sup>          | 7.4 ± 1.7            | 7.3 ± 1.7                       | 7.7 ± 1.5                       | 7.4 ± 1.6 <sup>c</sup>           | 8.1 ± 1.7            | 7.8 ± 1.5                      | 7.8 ± 1.6                      | 8.0 ± 1.6 <sup>d</sup>          |
| POEM score, mean ± SD       | 22.2 ± 5.7        | 22.2 ± 4.3                     | 23.4 ± 4.4                     | 22.3 ± 5.5                      | 20.9 ± 6.0           | 21.3 ± 5.0                      | 22.3 ± 4.8                      | 21.7 ± 5.1                       | 22.8 ± 5.9           | 22.7 ± 4.2                     | 23.8 ± 4.6                     | 22.6 ± 5.1                      |
| DLQI score, mean ± SD       | 17.4 ± 6.3        | 16.7 ± 6.3                     | 18.2 ± 6.1                     | 17.1 ± 6.8                      | 16.2 ± 6.8           | 15.4 ± 6.5                      | 16.6 ± 6.3                      | 15.9 ± 6.3                       | 18.5 ± 6.3           | 17.5 ± 6.5                     | 18.6 ± 5.9                     | 18.0 ± 6.3                      |

*%BSA* percentage of body surface area, *Abro* abrocitinib, *DLQI* Dermatology Life Quality Index, *Dupi* dupilumab, *EASI* Eczema Area and Severity Index, *IGA* Investigator's Global Assessment, *Pbo* placebo, *POEM* Patient-Oriented Eczema Measure, *PP-NRS* Peak Pruritus Numerical Rating Scale, *QD* once daily, *Q2W* once every 2 weeks

<sup>a</sup>American Indian or Alaska Native, multiracial, or race not reported

<sup>b</sup>*n* = 79 patients

<sup>c</sup>*n* = 174 patients

<sup>d</sup>*n* = 59 patients

**Supplementary Table 2** Patient demographics and baseline disease characteristics by treatment group for patients with %BSA > 50 and %BSA > 65

|                             | %BSA > 50<br><i>n</i> = 360 |                                            |                                            |                                          | %BSA > 65<br><i>n</i> = 214 |                                           |                                           |                                          |
|-----------------------------|-----------------------------|--------------------------------------------|--------------------------------------------|------------------------------------------|-----------------------------|-------------------------------------------|-------------------------------------------|------------------------------------------|
|                             | Placebo<br><i>n</i> = 58    | Abrocitinib<br>100 mg QD<br><i>n</i> = 100 | Abrocitinib<br>200 mg QD<br><i>n</i> = 106 | Dupilumab<br>300 mg Q2W<br><i>n</i> = 96 | Placebo<br><i>n</i> = 37    | Abrocitinib<br>100 mg QD<br><i>n</i> = 61 | Abrocitinib<br>200 mg QD<br><i>n</i> = 62 | Dupilumab<br>300 mg Q2W<br><i>n</i> = 54 |
| Age, mean ± SD, years       | 34.0 ± 13.9                 | 36.3 ± 14.6                                | 37.4 ± 14.7                                | 35.4 ± 13.5                              | 33.1 ± 12.5                 | 38.0 ± 15.5                               | 36.1 ± 13.7                               | 36.5 ± 13.0                              |
| Sex, <i>n</i> (%)           |                             |                                            |                                            |                                          |                             |                                           |                                           |                                          |
| Female                      | 19 (32.8)                   | 43 (43.0)                                  | 50 (47.2)                                  | 41 (42.7)                                | 12 (32.4)                   | 26 (42.6)                                 | 25 (40.3)                                 | 27 (50.0)                                |
| Race, <i>n</i> (%)          |                             |                                            |                                            |                                          |                             |                                           |                                           |                                          |
| White                       | 33 (56.9)                   | 76 (76.0)                                  | 69 (65.1)                                  | 64 (66.7)                                | 20 (54.1)                   | 45 (73.8)                                 | 43 (69.4)                                 | 33 (61.1)                                |
| Black or African American   | 5 (8.6)                     | 2 (2.0)                                    | 1 (0.9)                                    | 6 (6.3)                                  | 4 (10.8)                    | 1 (1.6)                                   | 1 (1.6)                                   | 4 (7.4)                                  |
| Asian                       | 18 (31.0)                   | 21 (21.0)                                  | 35 (33.0)                                  | 22 (22.9)                                | 11 (29.7)                   | 14 (23.0)                                 | 18 (29.0)                                 | 13 (24.1)                                |
| Other <sup>a</sup>          | 2 (3.4)                     | 1 (1.0)                                    | 1 (0.9)                                    | 4 (4.2)                                  | 2 (5.4)                     | 1 (1.6)                                   | 0 (0.0)                                   | 4 (7.4)                                  |
| IGA score, <i>n</i> (%)     |                             |                                            |                                            |                                          |                             |                                           |                                           |                                          |
| 3 (moderate)                | 25 (43.1)                   | 44 (44.0)                                  | 49 (46.2)                                  | 44 (45.8)                                | 14 (37.8)                   | 18 (29.5)                                 | 24 (38.7)                                 | 18 (33.3)                                |
| 4 (severe)                  | 33 (56.9)                   | 56 (56.0)                                  | 57 (53.8)                                  | 52 (54.2)                                | 23 (62.2)                   | 43 (70.5)                                 | 38 (61.3)                                 | 36 (66.7)                                |
| %BSA involvement, mean ± SD | 73.1 ± 14.4                 | 70.9 ± 14.7                                | 71.2 ± 14.2                                | 69.5 ± 12.8                              | 82.0 ± 9.5                  | 80.4 ± 10.3                               | 80.9 ± 10.3                               | 78.8 ± 8.9                               |
| EASI score, mean ± SD       | 42.4 ± 9.8                  | 42.0 ± 12.4                                | 42.0 ± 11.8                                | 41.4 ± 10.4                              | 47.0 ± 7.8                  | 48.4 ± 10.7                               | 47.2 ± 11.7                               | 45.9 ± 10.5                              |
| PP-NRS score, mean ± SD     | 7.6 ± 1.8                   | 7.4 ± 1.6                                  | 7.6 ± 1.5                                  | 7.9 ± 1.6 <sup>b</sup>                   | 7.9 ± 1.8                   | 7.5 ± 1.6                                 | 7.7 ± 1.5                                 | 7.8 ± 1.6 <sup>c</sup>                   |
| POEM score, mean ± SD       | 21.4 ± 6.2                  | 21.8 ± 4.9                                 | 22.7 ± 4.8                                 | 21.9 ± 5.2                               | 22.1 ± 5.9                  | 22.2 ± 4.4                                | 23.4 ± 4.6                                | 21.7 ± 5.4                               |
| DLQI score, mean ± SD       | 17.0 ± 6.9                  | 16.3 ± 6.5                                 | 16.8 ± 6.2                                 | 16.6 ± 6.1                               | 17.9 ± 6.3                  | 17.4 ± 6.5                                | 18.2 ± 6.3                                | 17.8 ± 6.3                               |

%BSA percentage of body surface area, *DLQI* Dermatology Life Quality Index, *EASI* Eczema Area and Severity Index, *IGA* Investigator's Global Assessment, *POEM* Patient-Oriented Eczema Measure, *PP-NRS* Peak Pruritus Numerical Rating Scale, *QD* once daily, *Q2W* once every 2 weeks

<sup>a</sup>American Indian or Alaska Native, multiracial, or race not reported

<sup>b</sup>*n* = 95 patients

<sup>c</sup>*n* = 53 patients

**Supplementary Table 3** Patient demographics and baseline disease characteristics by treatment group for patients who failed or were intolerant to prior systemic agents<sup>a</sup>

|                             | <b>Failure or intolerance to prior systemic agents<sup>a</sup></b> |                                                    |                                                    |                                                   |
|-----------------------------|--------------------------------------------------------------------|----------------------------------------------------|----------------------------------------------------|---------------------------------------------------|
|                             | <b><i>n</i> = 121</b>                                              |                                                    |                                                    |                                                   |
|                             | <b>Placebo<br/><i>n</i> = 19</b>                                   | <b>Abrocitinib<br/>100 mg QD<br/><i>n</i> = 28</b> | <b>Abrocitinib<br/>200 mg QD<br/><i>n</i> = 29</b> | <b>Dupilumab<br/>300 mg Q2W<br/><i>n</i> = 45</b> |
| Age, mean ± SD, years       | 33.3 ± 14.7                                                        | 34.9 ± 13.0                                        | 38.5 ± 13.0                                        | 37.4 ± 13.9                                       |
| Sex, <i>n</i> (%)           |                                                                    |                                                    |                                                    |                                                   |
| Female                      | 2 (10.5)                                                           | 9 (32.1)                                           | 11 (37.9)                                          | 18 (40.0)                                         |
| Race, <i>n</i> (%)          |                                                                    |                                                    |                                                    |                                                   |
| White                       | 12 (63.2)                                                          | 23 (82.1)                                          | 19 (65.5)                                          | 31 (68.9)                                         |
| Black or African American   | 1 (5.3)                                                            | 0 (0.0)                                            | 0 (0.0)                                            | 0 (0.0)                                           |
| Asian                       | 4 (21.1)                                                           | 5 (17.9)                                           | 10 (34.5)                                          | 12 (26.7)                                         |
| Other <sup>b</sup>          | 2 (10.5)                                                           | 0 (0.0)                                            | 0 (0.0)                                            | 2 (4.4)                                           |
| IGA score, <i>n</i> (%)     |                                                                    |                                                    |                                                    |                                                   |
| 3 (moderate)                | 10 (52.6)                                                          | 18 (64.3)                                          | 8 (27.6)                                           | 22 (48.9)                                         |
| 4 (severe)                  | 9 (47.4)                                                           | 10 (35.7)                                          | 21 (72.4)                                          | 23 (51.1)                                         |
| %BSA involvement, mean ± SD | 60.1 ± 21.7                                                        | 54.9 ± 22.0                                        | 60.9 ± 25.4                                        | 56.8 ± 22.0                                       |
| EASI score, mean ± SD       | 36.0 ± 12.1                                                        | 34.1 ± 14.6                                        | 40.2 ± 14.4                                        | 36.7 ± 13.0                                       |
| PP-NRS score, mean ± SD     | 7.4 ± 2.0                                                          | 7.0 ± 1.6                                          | 7.7 ± 1.3                                          | 7.5 ± 1.6 <sup>c</sup>                            |
| POEM score, mean ± SD       | 21.1 ± 5.9                                                         | 19.9 ± 5.6                                         | 22.8 ± 5.2                                         | 20.7 ± 5.6                                        |
| DLQI score, mean ± SD       | 16.1 ± 6.6                                                         | 16.1 ± 5.7                                         | 17.2 ± 5.7                                         | 15.6 ± 6.4                                        |

*DLQI* Dermatology Life Quality Index, *EASI* Eczema Area and Severity Index, *IGA* Investigator's Global

Assessment, *POEM* Patient-Oriented Eczema Measure, *PP-NRS* Peak Pruritus Numerical Rating Scale, *QD*

once daily, *Q2W* once every 2 weeks

<sup>a</sup>Excluding patients who took only corticosteroids

<sup>b</sup>American Indian or Alaska Native, multiracial, or race not reported

<sup>c</sup>*n* = 44 patients

**Supplementary Table 4** Patient demographics and baseline disease characteristics by treatment group for the combined subgroup<sup>a</sup>

|                             | <b>Combined subgroup<sup>a</sup></b><br><i>n</i> = 48 |                                                  |                                                   |                                                  |
|-----------------------------|-------------------------------------------------------|--------------------------------------------------|---------------------------------------------------|--------------------------------------------------|
|                             | <b>Placebo</b><br><i>n</i> = 7                        | <b>Abrocitinib<br/>100 mg QD</b><br><i>n</i> = 8 | <b>Abrocitinib<br/>200 mg QD</b><br><i>n</i> = 16 | <b>Dupilumab<br/>300 mg Q2W</b><br><i>n</i> = 17 |
| Age, mean ± SD, years       | 27.9 ± 7.8                                            | 28.4 ± 8.0                                       | 35.1 ± 9.7                                        | 41.9 ± 16.0                                      |
| Sex, <i>n</i> (%)           |                                                       |                                                  |                                                   |                                                  |
| Female                      | 0 (0.0)                                               | 2 (25.0)                                         | 6 (37.5)                                          | 4 (23.5)                                         |
| Race, <i>n</i> (%)          |                                                       |                                                  |                                                   |                                                  |
| White                       | 3 (42.9)                                              | 6 (75.0)                                         | 10 (62.5)                                         | 8 (47.1)                                         |
| Black or African American   | 1 (14.3)                                              | 0 (0.0)                                          | 0 (0.0)                                           | 0 (0.0)                                          |
| Asian                       | 2 (28.6)                                              | 2 (25.0)                                         | 6 (37.5)                                          | 7 (41.2)                                         |
| Other <sup>b</sup>          | 1 (14.3)                                              | 0 (0.0)                                          | 0 (0.0)                                           | 2 (11.8)                                         |
| IGA score, <i>n</i> (%)     |                                                       |                                                  |                                                   |                                                  |
| 3 (moderate)                | 0 (0.0)                                               | 0 (0.0)                                          | 0 (0.0)                                           | 0 (0.0)                                          |
| 4 (severe)                  | 7 (100.0)                                             | 8 (100.0)                                        | 16 (100.0)                                        | 17 (100.0)                                       |
| %BSA involvement, mean ± SD | 77.1 ± 13.5                                           | 74.9 ± 14.8                                      | 78.4 ± 14.0                                       | 74.6 ± 11.7                                      |
| EASI score, mean ± SD       | 45.6 ± 11.1                                           | 46.0 ± 12.6                                      | 50.6 ± 8.0                                        | 45.6 ± 11.4                                      |
| PP-NRS score, mean ± SD     | 7.6 ± 2.1                                             | 6.9 ± 1.5                                        | 8.1 ± 0.9                                         | 7.7 ± 1.7 <sup>c</sup>                           |
| POEM score, mean ± SD       | 22.6 ± 6.3                                            | 20.9 ± 3.5                                       | 25.4 ± 2.7                                        | 20.4 ± 6.2                                       |
| DLQI score, mean ± SD       | 18.3 ± 5.5                                            | 16.5 ± 6.2                                       | 18.8 ± 5.1                                        | 14.9 ± 6.8                                       |

*DLQI* Dermatology Life Quality Index, *EASI* Eczema Area and Severity Index, *IGA* Investigator's Global

Assessment, *POEM* Patient-Oriented Eczema Measure, *PP-NRS* Peak Pruritus Numerical Rating Scale, *QD* once daily, *Q2W* once every 2 weeks

<sup>a</sup>Combined subgroup defined as patients with baseline IGA= 4, and EASI > 21, and %BSA > 50, and failure or intolerance to prior systemic agents (excluding patients who took only corticosteroids)

<sup>b</sup>American Indian or Alaska Native, multiracial, or race not reported

<sup>c</sup>*n* = 16 patients

**Supplementary Table 5** Prior systemic therapies in patients who failed or were intolerant to prior therapy with systemic agents<sup>a</sup>

|                                                    | <b>Placebo<br/><i>n</i> = 19</b> | <b>Abrocitinib<br/>100 mg QD<br/><i>n</i> = 28</b> | <b>Abrocitinib<br/>200 mg QD<br/><i>n</i> = 29</b> | <b>Dupilumab<br/>300 mg Q2W<br/><i>n</i> = 45</b> |
|----------------------------------------------------|----------------------------------|----------------------------------------------------|----------------------------------------------------|---------------------------------------------------|
| <b>Systemic agents, <i>n</i> (%)<sup>b</sup></b>   | 19 (100)                         | 28 (100.0)                                         | 29 (100.0)                                         | 45 (100.0)                                        |
| Nonbiologic agents <sup>c</sup>                    | 16 (84.2)                        | 26 (92.9)                                          | 25 (86.2)                                          | 42 (93.3)                                         |
| Cyclosporine                                       | 11 (57.9)                        | 21 (75.0)                                          | 18 (62.1)                                          | 33 (73.3)                                         |
| Corticosteroids                                    | 8 (42.1)                         | 11 (39.3)                                          | 14 (48.3)                                          | 23 (51.1)                                         |
| Other nonbiologic                                  | 8 (42.1)                         | 9 (32.1)                                           | 9 (31.0)                                           | 19 (42.2)                                         |
| Biologic agents (excluding dupilumab) <sup>c</sup> | 3 (15.8)                         | 2 (7.1)                                            | 4 (13.8)                                           | 3 (6.7)                                           |

*QD* once daily, *Q2W* every 2 weeks

<sup>a</sup>Excluding patients who took only corticosteroids

<sup>b</sup>Patients were exclusively counted in either the nonbiologic subcategory or biologic subcategory, with the latter taking precedence

<sup>c</sup>Patients could be counted more than once for each prior medication type; biologic agents included efalizumab, omalizumab, and tralokinumab



**Supplementary Table 6** Reasons for discontinuation of prior systemic therapies by treatment group in patients who failed or were intolerant to prior systemic agents<sup>a</sup>

|                                                             | <b>Placebo<br/><i>n</i> = 19</b> | <b>Abrocitinib<br/>100 mg QD<br/><i>n</i> = 28</b> | <b>Abrocitinib<br/>200 mg QD<br/><i>n</i> = 29</b> | <b>Dupilumab<br/>300 mg Q2W<br/><i>n</i> = 45</b> |
|-------------------------------------------------------------|----------------------------------|----------------------------------------------------|----------------------------------------------------|---------------------------------------------------|
| <b>Reason for discontinuation, <i>n</i> (%)<sup>b</sup></b> |                                  |                                                    |                                                    |                                                   |
| Lack of efficacy                                            | 18 (94.7)                        | 24 (85.7)                                          | 23 (79.3)                                          | 41 (91.1)                                         |
| Intolerability                                              | 6 (31.6)                         | 3 (10.7)                                           | 3 (10.3)                                           | 6 (13.3)                                          |
| Adverse event                                               | 0 (0.0)                          | 1 (3.6)                                            | 4 (13.8)                                           | 5 (11.1)                                          |
| Other                                                       | 0 (0.0)                          | 1 (3.6)                                            | 0 (0.0)                                            | 0 (0.0)                                           |

*QD* once daily, *Q2W* every 2 weeks

<sup>a</sup>Excluding patients who took only corticosteroids. Included data up to 28 days after last dose of study

<sup>b</sup>Patients may be counted more than once across the unique discontinuation reasons

**Supplementary Figure 1** Time (days) to first PP-NRS4 response in patients with baseline **a** IGA = 4, **b** EASI > 21, **c** EASI > 38, **d** failure of or intolerance to prior systemic agents, **e** %BSA > 50, **f** %BSA > 65 and **g** in the combined subgroup<sup>b</sup>

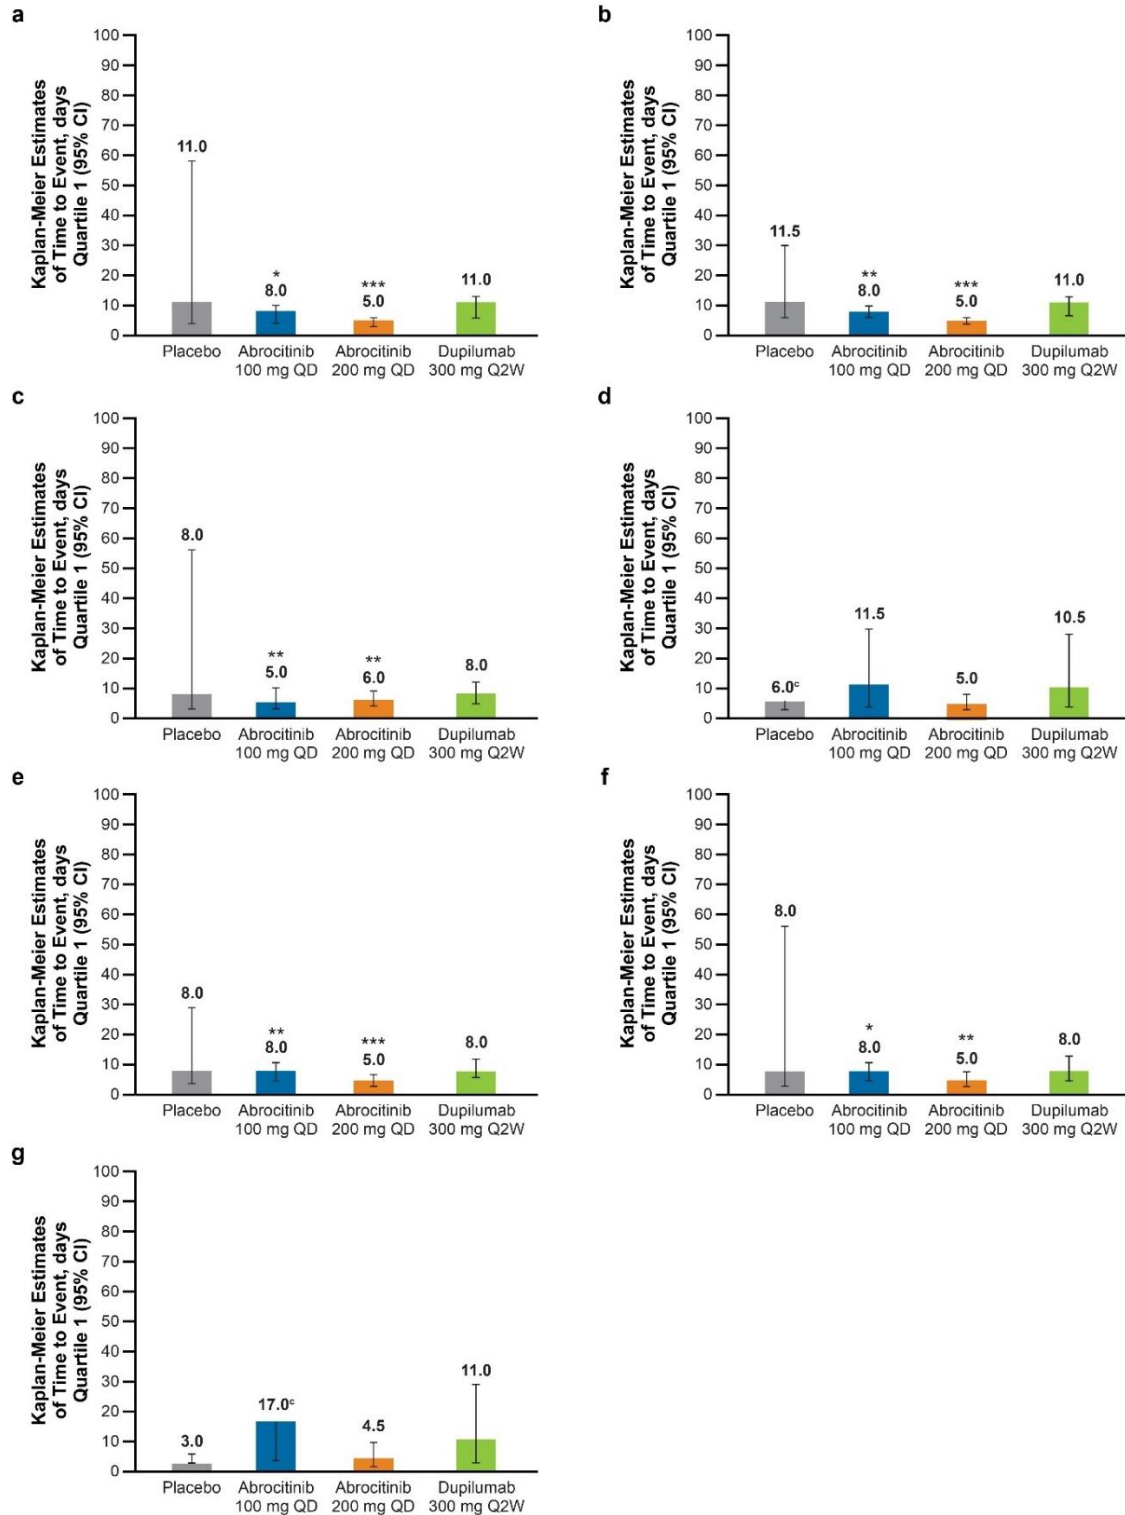

\* $p < 0.05$ , \*\* $p < 0.01$ , and \*\*\* $p < 0.001$  for abrocitinib versus placebo. Comparison between dupilumab and placebo was not performed for this parameter. <sup>a</sup>Excluding patients who took only corticosteroids. <sup>b</sup>The combined subgroup was defined as patients with baseline IGA= 4, and EASI > 21, and %BSA > 50 and failure or intolerance to prior systemic agents (excluding patients who took only corticosteroids). <sup>c</sup>Upper bound of the 95% CI is not evaluable because too few events were observed. %BSA percentage of body surface area, EASI Eczema Area and Severity Index, IGA Investigator's Global Assessment, PP-NRS4  $\geq 4$ -point improvement from baseline in Peak Pruritus-Numerical Rating Scale, QD once daily, Q2W once every 2 weeks

**Supplementary Figure 2** LSM change from baseline in PP-NRS from day 2 to day 15 in patients with baseline a IGA = 4, b EASI > 21, c EASI > 38, d failure or intolerance to prior systemic agents,<sup>a</sup> e %BSA >50, f %BSA >65, and g in the combined subgroup<sup>b</sup>

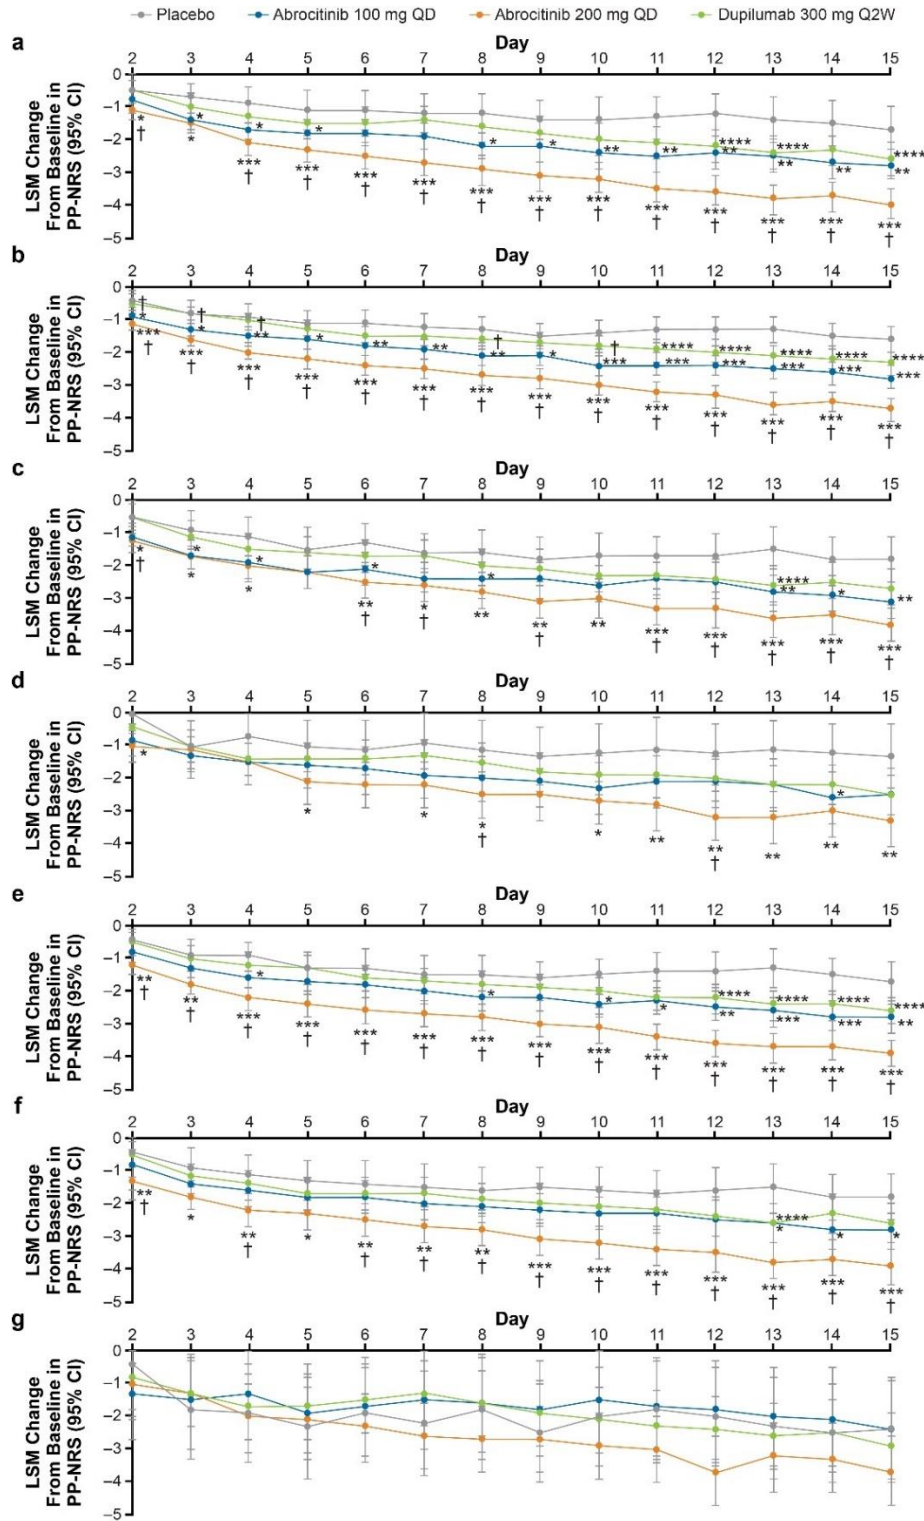

\* $p < 0.05$ , \*\* $p < 0.01$ , and \*\*\* $p < 0.001$  for abrocitinib versus placebo. \*\*\*\*Significant difference between dupilumab versus placebo based on 95% CIs for the LSM difference. †Significant difference between abrocitinib versus dupilumab based on 95% CIs for the LSM difference. <sup>a</sup>Excluding patients who took only corticosteroids. <sup>b</sup>The combined subgroup was defined as patients with baseline IGA= 4, and EASI > 21, and %BSA > 50 and failure or intolerance to prior systemic agents (excluding patients who took only corticosteroids). %BSA percentage of body surface area, EASI Eczema Area and Severity Index, IGA Investigator's Global Assessment, LSM least squares mean, PP-NRS Peak Pruritus Numerical Rating Scale, QD once daily, Q2W once every 2 weeks

**Supplementary Figure 3** LSM change from baseline in POEM at week 16 in patients with baseline **a** IGA= 4, **b** EASI > 21, **c** EASI > 38, **d** failure or intolerance to prior systemic agents,<sup>a</sup> **e** %BSA > 50, **f** %BSA > 65 and **g** in the combined subgroup<sup>b</sup>

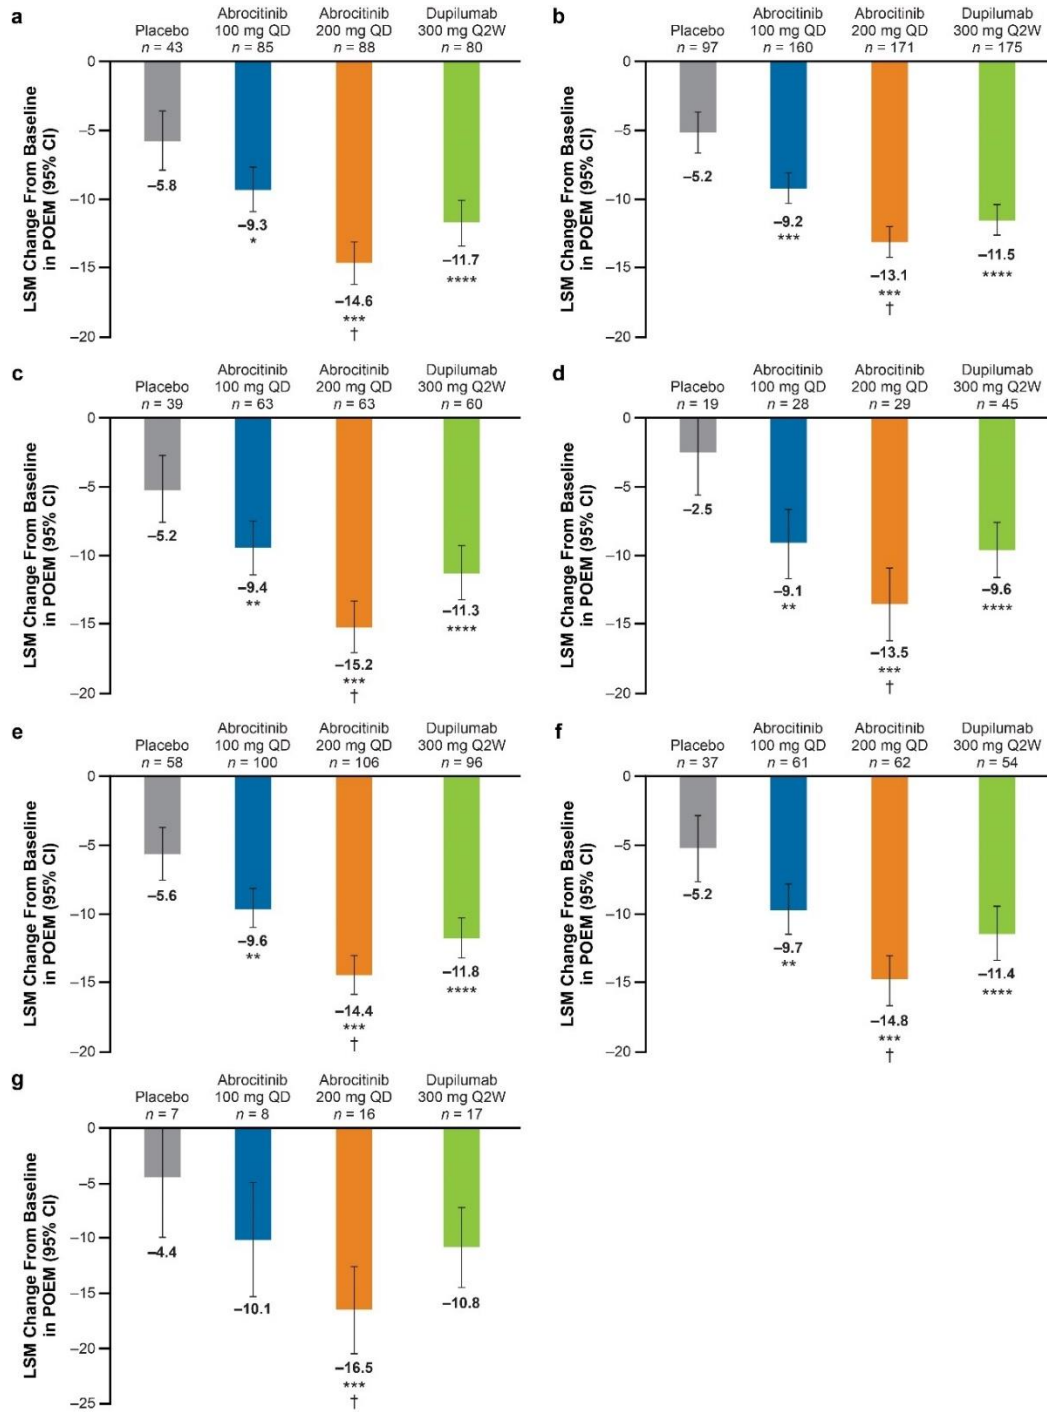

\* $p < 0.05$ , \*\* $p < 0.01$ , and \*\*\* $p < 0.001$  for abrocitinib versus placebo. \*\*\*\*Significant difference between dupilumab versus placebo based on 95% CIs for the LSM difference. †Significant difference between abrocitinib versus dupilumab based on 95% CIs for the LSM difference. <sup>a</sup>Excluding patients who took only corticosteroids. <sup>b</sup>The combined subgroup was defined as patients with baseline IGA = 4, and EASI > 21, and %BSA > 50 and failure or intolerance to prior systemic agents (excluding patients who took only corticosteroids). %BSA percentage of body surface area, EASI Eczema Area and Severity Index, IGA Investigator's Global Assessment, LSM least squares mean, POEM Patient-Oriented Eczema Measure, QD once daily, Q2W once every 2 weeks

**Supplementary Figure 4** LSM change from baseline in DLQI at week 16 in patients with baseline **a** IGA= 4, **b** EASI > 21, **c** EASI > 38, **d** failure or intolerance to prior systemic agents,<sup>a</sup> **e** %BSA > 50, **f** %BSA > 65 and **g** in the combined subgroup<sup>b</sup>

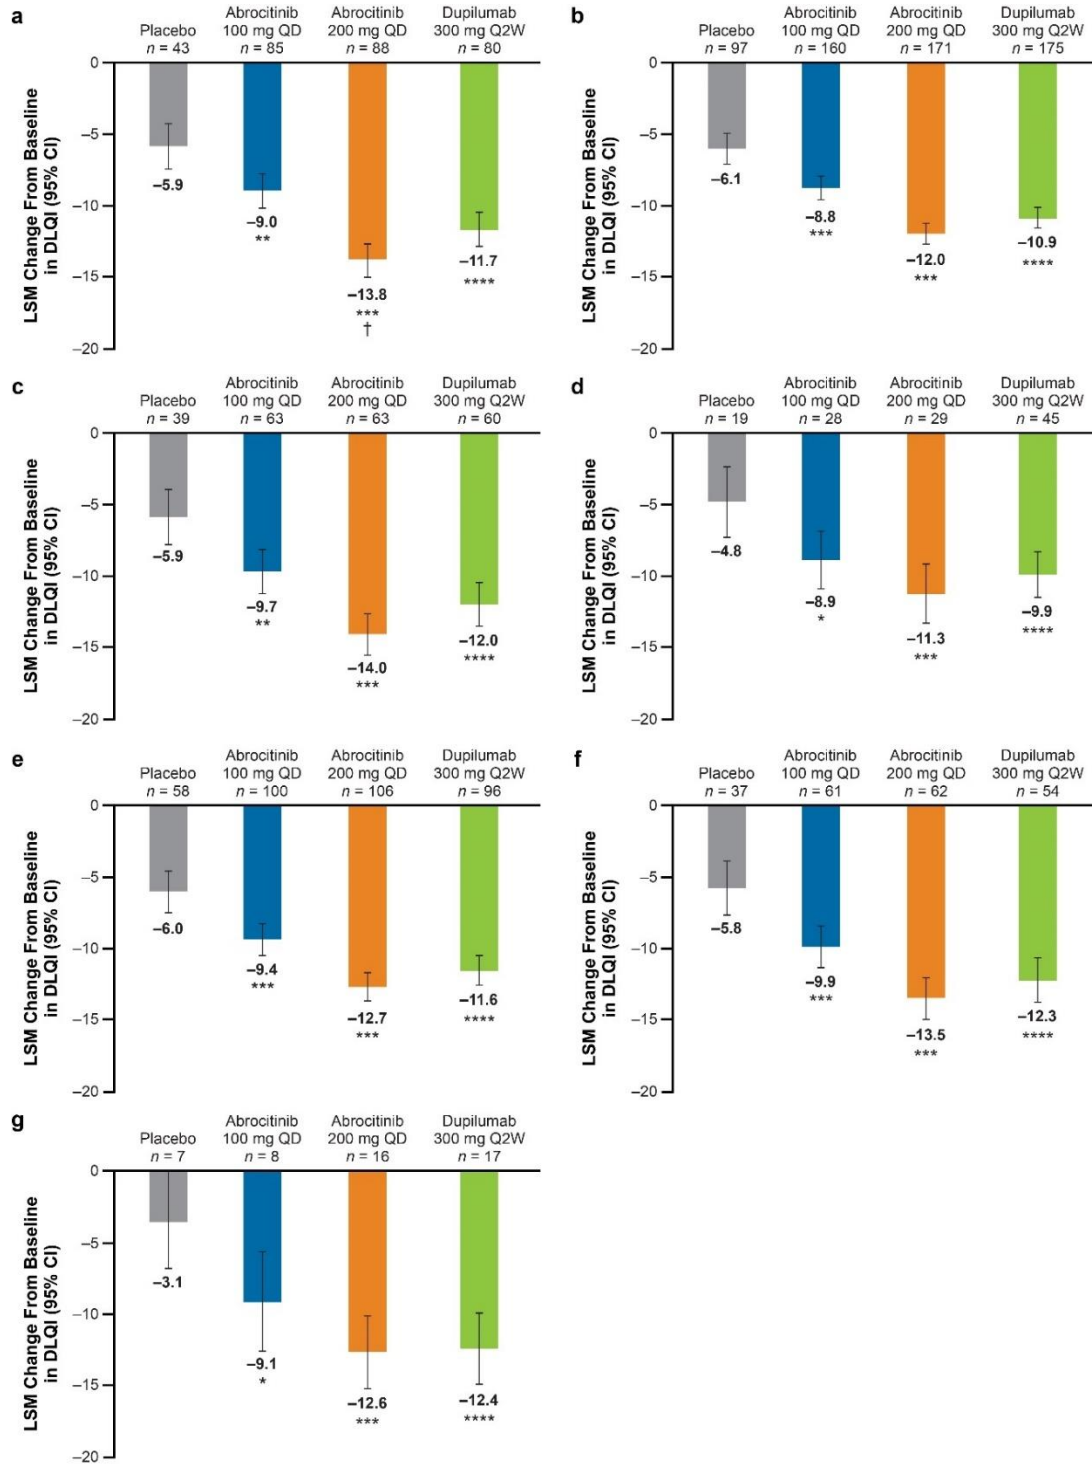



\* $p < 0.05$ , \*\* $p < 0.01$ , and \*\*\* $p < 0.001$  for abrocitinib versus placebo. \*\*\*\*Significant difference between dupilumab versus placebo based on 95% CIs for the LSM difference. †Significant difference between abrocitinib versus dupilumab based on 95% CIs for the LSM difference. <sup>a</sup>Excluding patients who took only corticosteroids. <sup>b</sup>The combined subgroup was defined as patients with baseline IGA= 4, and EASI > 21, and %BSA > 50 and failure or intolerance to prior systemic agents (excluding patients who took only corticosteroids). %BSA percentage of body surface area, *DLQI* Dermatology Life Quality Index, *EASI* Eczema Area and Severity Index, *IGA* Investigator's Global Assessment, *LSM* least squares mean, *QD* once daily, *Q2W* once every 2 weeks
